# Supplementary material
Source: ML conference proceedings conference paper supplement (https://proceedings.neurips.cc/paper_files/paper/2020/hash/12ffb0968f2f56e51a59a6beb37b2859-Abstract.html)
Supplement: Supplementary file [file 12ffb0968f2f56e51a59a6beb37b2859-Supplemental.pdf]

## Appendix A Derivation of $\gamma$ -Model-Based Rollout Weights

**Theorem 1.** Let  $\mu_n(\mathbf{s}_e \mid \mathbf{s}_t; \gamma)$  denote the distribution over states at the  $n^{\text{th}}$  sequential step of a  $\gamma$ -model rollout beginning from state  $\mathbf{s}_t$ . For any desired discount  $\tilde{\gamma} \in [\gamma, 1)$ , we may reweight the samples from these model rollouts according to the weights

$$\alpha_n = \frac{(1 - \tilde{\gamma})(\tilde{\gamma} - \gamma)^{n-1}}{(1 - \gamma)^n}$$

to obtain the state distribution drawn from  $\mu_1(\mathbf{s}_e \mid \mathbf{s}_t; \tilde{\gamma}) = \mu(\mathbf{s}_e \mid \mathbf{s}_t; \tilde{\gamma})$ . That is, we may reweight the steps of a  $\gamma$ -model rollout so as to match the distribution of a  $\tilde{\gamma}$ -model with larger discount:

$$\mu(\mathbf{s}_e \mid \mathbf{s}_t; \tilde{\gamma}) = \sum_{n=1}^{\infty} \alpha_n \mu_n(\mathbf{s}_e \mid \mathbf{s}_t; \gamma).$$

*Proof.* Each step of the  $\gamma$ -model samples a time according to  $\Delta t \sim \text{Geom}(1 - \gamma)$ , so the time after  $n$   $\gamma$ -model steps is distributed according to the sum of  $n$  independent geometric random variables with identical parameters. This sum corresponds to a negative binomial random variable,  $\text{NB}(n, 1 - \gamma)$ , with the following pmf:

$$p_n(t) = \binom{t-1}{t-n} \gamma^{(t-n)} (1 - \gamma)^n \quad (7)$$

Equation 7 is mildly different from the textbook pmf because we want a distribution over the total number of trials (in our case, cumulative timesteps  $t$ ) instead of the number of successes before the  $n^{\text{th}}$  failure. The latter is more commonly used because it gives the random variable the same support,  $t \geq 0$ , for all  $n$ . The form in Equation 7 only has support for  $t \geq n$ , which substantially simplifies the following analysis.

The distributions  $q(t)$  expressible as a mixture over the per-timestep negative binomial distributions  $p_n$  are given by:

$$q(t) = \sum_{n=1}^t \alpha_n p_n(t),$$

in which  $\alpha_n$  are the mixture weights. Because  $p_n$  only has support for  $t \geq n$ , it suffices to only consider the first  $t$   $\gamma$ -model steps when solving for  $q(t)$ .

We are interested in the scenario in which  $q(t)$  is also a geometric random variable with smaller parameter, corresponding to a larger discount  $\tilde{\gamma}$ . We proceed by setting  $q(t) = \text{Geom}(1 - \tilde{\gamma})$  and solving for the mixture weights  $\alpha_n$  by induction.

**Base case.** Let  $n = 1$ . Because  $p_1$  is the only mixture component with support at  $t = 1$ ,  $\alpha_1$  is determined by  $q(1)$ :

$$\begin{aligned} 1 - \tilde{\gamma} &= \alpha_1 \binom{t-1}{t-1} \gamma^{t-1} (1 - \gamma)^t \\ &= \alpha_1 (1 - \gamma). \end{aligned}$$

Solving for  $\alpha_1$  gives:

$$\alpha_1 = \frac{1 - \tilde{\gamma}}{1 - \gamma}.$$

**Induction step.** We now assume the form of  $\alpha_k$  for  $k = 1, \dots, n-1$  and solve for  $\alpha_n$  using  $q(n)$ .

$$\begin{aligned}
(1 - \tilde{\gamma})\tilde{\gamma}^{n-1} &= \sum_{k=1}^n \alpha_k \binom{n-1}{n-k} \gamma^{n-k} (1-\gamma)^k \\
&= \left\{ \sum_{k=1}^{n-1} \frac{(1-\tilde{\gamma})(\tilde{\gamma}-\gamma)^{k-1}}{(1-\gamma)^k} \binom{n-1}{n-k} \gamma^{n-k} (1-\gamma)^k \right\} + \alpha_n (1-\gamma)^n \\
&= (1-\tilde{\gamma}) \left\{ \sum_{k=1}^{n-1} \binom{n-1}{n-k} (\tilde{\gamma}-\gamma)^{k-1} \gamma^{n-k} \right\} + \alpha_n (1-\gamma)^n \\
&= (1-\tilde{\gamma}) \left\{ \sum_{k=1}^n \binom{n-1}{n-k} (\tilde{\gamma}-\gamma)^{k-1} \gamma^{n-k} \right\} - (1-\tilde{\gamma})(\tilde{\gamma}-\gamma)^{n-1} + \alpha_n (1-\gamma)^n \\
&= (1-\tilde{\gamma})\tilde{\gamma}^{n-1} - (1-\tilde{\gamma})(\tilde{\gamma}-\gamma)^{n-1} + \alpha_n (1-\gamma)^n
\end{aligned}$$

Solving for  $\alpha_n$  gives

$$\alpha_n = \frac{(1-\tilde{\gamma})(\tilde{\gamma}-\gamma)^{n-1}}{(1-\gamma)^n}$$

as desired.  $\square$

## Appendix B Derivation of $\gamma$ -Model-Based Value Expansion

In this section, we derive the  $\gamma$ -MVE estimator and provide pseudo-code showing how it may be used as a drop-in replacement for value estimation in an actor-critic algorithm. Before we begin, we prove a lemma which will become useful in interpreting value functions as weighted averages.

**Lemma 1.**

$$1 - \sum_{n=1}^H \alpha_n = \left( \frac{\tilde{\gamma}-\gamma}{1-\gamma} \right)^H$$

*Proof.*

$$\begin{aligned}
1 - \sum_{n=1}^H \alpha_n &= 1 - \left( \frac{1-\tilde{\gamma}}{\tilde{\gamma}-\gamma} \right) \sum_{n=1}^H \left( \frac{\tilde{\gamma}-\gamma}{1-\gamma} \right)^n \\
&= 1 - \left( \frac{1-\tilde{\gamma}}{\tilde{\gamma}-\gamma} \right) \frac{\left( \frac{\tilde{\gamma}-\gamma}{1-\gamma} \right) - \left( \frac{\tilde{\gamma}-\gamma}{1-\gamma} \right)^{H+1}}{\frac{1-\tilde{\gamma}}{1-\gamma}} \\
&= 1 - \left( \frac{1-\gamma}{\tilde{\gamma}-\gamma} \right) \left( \left( \frac{\tilde{\gamma}-\gamma}{1-\gamma} \right) - \left( \frac{\tilde{\gamma}-\gamma}{1-\gamma} \right)^{H+1} \right) \\
&= \left( \frac{\tilde{\gamma}-\gamma}{1-\gamma} \right)^H
\end{aligned}$$

$\square$

We now proceed to the  $\gamma$ -MVE estimator itself.

**Theorem 2.** For  $\tilde{\gamma} > \gamma$ ,  $V(\mathbf{s}_t; \tilde{\gamma})$  may be decomposed as a weighted average of  $H$   $\gamma$ -model steps and a terminal value estimation. We denote this as the  $\gamma$ -MVE estimator:

$$\hat{V}_{\gamma\text{-MVE}}(\mathbf{s}_t; \tilde{\gamma}) = \frac{1}{1-\tilde{\gamma}} \sum_{n=1}^H \alpha_n \mathbb{E}_{\mathbf{s}_e \sim \mu_n(\cdot|\mathbf{s}_t; \gamma)} [r(\mathbf{s}_e)] + \left( \frac{\tilde{\gamma}-\gamma}{1-\gamma} \right)^H \mathbb{E}_{\mathbf{s}_e \sim \mu_H(\cdot|\mathbf{s}_t; \gamma)} [V(\mathbf{s}_e; \tilde{\gamma})].$$

*Proof.*

$$\begin{aligned}
V(\mathbf{s}_t; \tilde{\gamma}) &= \frac{1}{1 - \tilde{\gamma}} \mathbb{E}_{\mathbf{s}_e \sim \mu(\cdot | \mathbf{s}_t; \tilde{\gamma})} [r(\mathbf{s}_e)] \\
&= \frac{1}{1 - \tilde{\gamma}} \sum_{n=1}^{\infty} \alpha_n \mathbb{E}_{\mathbf{s}_e \sim \mu_n(\cdot | \mathbf{s}_t; \gamma)} [r(\mathbf{s}_e)] \\
&= \underbrace{\frac{1}{1 - \tilde{\gamma}} \sum_{n=1}^H \alpha_n \mathbb{E}_{\mathbf{s}_e \sim \mu_n(\cdot | \mathbf{s}_t; \gamma)} [r(\mathbf{s}_e)]}_{\textcircled{1}} + \underbrace{\frac{1}{1 - \tilde{\gamma}} \sum_{n=H+1}^{\infty} \alpha_n \mathbb{E}_{\mathbf{s}_e \sim \mu_n(\cdot | \mathbf{s}_t; \gamma)} [r(\mathbf{s}_e)]}_{\textcircled{2}}. \quad (8)
\end{aligned}$$

The second equality rewrites an expectation over a  $\tilde{\gamma}$ -model as an expectation over a rollout of a  $\gamma$ -model using step weights  $\alpha_n$  from Theorem 1. We recognize  $\textcircled{1}$  as the model-based component of the value estimation in  $\gamma$ -MVE. All that remains is to write  $\textcircled{2}$  using a terminal value function.

$$\begin{aligned}
\sum_{n=H+1}^{\infty} \alpha_n \mathbb{E}_{\mathbf{s}_e \sim \mu_n(\cdot | \mathbf{s}_t; \gamma)} [r(\mathbf{s}_e)] &= \sum_{n=1}^{\infty} \alpha_{H+n} \mathbb{E}_{\mathbf{s}_e \sim \mu_{H+n}(\cdot | \mathbf{s}_t; \gamma)} [r(\mathbf{s}_e)] \\
&= \left( \frac{\tilde{\gamma} - \gamma}{1 - \gamma} \right)^H \mathbb{E}_{\mathbf{s}_H \sim \mu_H(\cdot | \mathbf{s}_t; \gamma)} \left[ \sum_{n=1}^{\infty} \alpha_n \mathbb{E}_{\mathbf{s}_e \sim \mu_n(\cdot | \mathbf{s}_H; \gamma)} [r(\mathbf{s}_e)] \right] \\
&= \left( \frac{\tilde{\gamma} - \gamma}{1 - \gamma} \right)^H \mathbb{E}_{\mathbf{s}_H \sim \mu_H(\cdot | \mathbf{s}_t; \gamma)} [\mathbb{E}_{\mathbf{s}_e \sim \mu(\cdot | \mathbf{s}_H; \tilde{\gamma})} [r(\mathbf{s}_e)]] \\
&= (1 - \tilde{\gamma}) \left( \frac{\tilde{\gamma} - \gamma}{1 - \gamma} \right)^H \mathbb{E}_{\mathbf{s}_e \sim \mu_H(\cdot | \mathbf{s}_t; \gamma)} [V(\mathbf{s}_e; \tilde{\gamma})] \quad (9)
\end{aligned}$$

The second equality uses  $\alpha_{H+n} = \left( \frac{\tilde{\gamma} - \gamma}{1 - \gamma} \right)^H \alpha_n$  and the time-invariance of  $G^{(n)}$  with respect to its conditioning state. Plugging Equation 9 into Equation 8 gives:

$$V(\mathbf{s}_t; \tilde{\gamma}) = \frac{1}{1 - \tilde{\gamma}} \sum_{n=1}^H \alpha_n \mathbb{E}_{\mathbf{s}_e \sim \mu_n(\cdot | \mathbf{s}_t; \gamma)} [r(\mathbf{s}_e)] + \left( \frac{\tilde{\gamma} - \gamma}{1 - \gamma} \right)^H \mathbb{E}_{\mathbf{s}_e \sim \mu_H(\cdot | \mathbf{s}_t; \gamma)} [V(\mathbf{s}_e; \tilde{\gamma})].$$

□

**Remark 1.** Using Lemma 1 to substitute  $1 - \sum_{n=1}^H \alpha_n$  in place of  $\left( \frac{\tilde{\gamma} - \gamma}{1 - \gamma} \right)^H$  clarifies the interpretation of  $V(\mathbf{s}_t; \tilde{\gamma})$  as a weighted average over  $H$   $\gamma$ -model steps and a terminal value function. Because the mixture weights must sum to 1, it is unsurprising that the weight on the terminal value function turned out to be  $\left( \frac{\tilde{\gamma} - \gamma}{1 - \gamma} \right)^H = 1 - \sum_{n=1}^H \alpha_n$ .

**Remark 2.** Setting  $\gamma = 0$  recovers standard MVE with a single-step model, as the weights on the model steps simplify to  $\alpha_n = (1 - \tilde{\gamma})(\tilde{\gamma} - \gamma)^{n-1}$  and the weight on the terminal value function simplifies to  $\tilde{\gamma}^H$ .

## Appendix C Implementation Details

**$\gamma$ -MVE algorithmic description.** The  $\gamma$ -MVE estimator may be used for value estimation in any actor-critic algorithm. We describe the variant used in our control experiments, in which it is used in the soft actor critic algorithm (SAC; Haarnoja et al. 2018), in Algorithm 3. The  $\gamma$ -model update is unique to  $\gamma$ -MVE; the objectives for the value function and policy are identical to those in SAC. The objective for the  $Q$ -function differs only by replacing  $V(\mathbf{s}_{t+1})$  with  $V_{\gamma\text{-MVE}}(\mathbf{s}_{t+1})$ . For a detailed description of how the gradients of these objectives may be estimated, and for hyperparameters related to the training of the  $Q$ -function, value function, and policy, we refer to Haarnoja et al. (2018).

---

**Algorithm 3**  $\gamma$ -model based value expansion

---

```
1: Input  $\gamma$ : model discount,  $\tilde{\gamma}$ : value discount,  $\lambda$ : step size
2: Initialize  $\mu_\theta$ :  $\gamma$ -model generator
3: Initialize  $Q_\omega$ :  $Q$ -function,  $V_\xi$ : value function,  $\pi_\psi$ : policy,  $\mathcal{D}$ : replay buffer
4: for each iteration do
5:   for each environment step do
6:      $\mathbf{a}_t \sim \pi_\psi(\cdot | \mathbf{s}_t)$ 
7:      $\mathbf{s}_{t+1} \sim p(\cdot | \mathbf{s}_t, \mathbf{a}_t)$ 
8:      $\mathbf{r}_t = r(\mathbf{s}_t, \mathbf{a}_t)$ 
9:      $\mathcal{D} \leftarrow \mathcal{D} \cup \{\mathbf{s}_t, \mathbf{a}_t, \mathbf{r}_t, \mathbf{s}_{t+1}\}$ 
10:  end for
11:  for each gradient step do
12:    Sample transitions  $(\mathbf{s}_t, \mathbf{a}_t, \mathbf{r}_t, \mathbf{s}_{t+1})$  from  $\mathcal{D}$ 
13:    Update  $\mu_\theta$  to Algorithm 1 or 2
14:    Compute  $V_{\gamma\text{-MVE}}(\mathbf{s}_{t+1})$  according to Theorem 2
15:    Update  $Q$ -function parameters:
16:       $\omega \leftarrow \omega - \lambda \nabla_\omega \frac{1}{2} (Q_\omega(\mathbf{s}_t, \mathbf{a}_t) - (\mathbf{r}_t + \tilde{\gamma} V_{\gamma\text{-MVE}}(\mathbf{s}_{t+1})))^2$ 
17:    Update value function parameters:
18:       $\xi \leftarrow \xi - \lambda \nabla_\xi \frac{1}{2} (V_\xi(\mathbf{s}_t) - \mathbb{E}_{\mathbf{a} \sim \pi_\psi(\cdot | \mathbf{s}_t)} [Q_\omega(\mathbf{s}_t, \mathbf{a}) - \log \pi_\psi(\mathbf{a} | \mathbf{s}_t)])^2$ 
19:    Update policy parameters:
20:       $\psi \leftarrow \psi - \lambda \nabla_\psi \mathbb{E}_{\mathbf{a} \sim \pi_\psi(\cdot | \mathbf{s}_t)} [\log \pi_\psi(\mathbf{a} | \mathbf{s}_t) - Q_\omega(\mathbf{s}_t, \mathbf{a})]$ 
21:  end for
22: end for
```

---

Table 1: GAN  $\gamma$ -model hyperparameters (Algorithm 1).

| Parameter                                                                | Value             |
|--------------------------------------------------------------------------|-------------------|
| Batch size                                                               | 128               |
| Number of $\mathbf{s}_e$ samples per $(\mathbf{s}_t, \mathbf{a}_t)$ pair | 512               |
| Delay parameter $\tau$                                                   | $5 \cdot 10^{-3}$ |
| Step size $\lambda$                                                      | $1 \cdot 10^{-4}$ |
| Replay buffer size (off-policy prediction experiments)                   | $2 \cdot 10^5$    |

**Network architectures.** For all GAN experiments, the  $\gamma$ -model generator  $\mu_\theta$  and discriminator  $D_\phi$  are instantiated as two-layer MLPs with hidden dimensions of 256 and leaky ReLU activations. For all normalizing flow experiments, we use a six-layer neural spline flow (Durkan et al., 2019) with 16 knots defined in the interval  $[-10, 10]$ . The rational-quadratic coupling transform uses a three-layer MLP with hidden dimensions of 256.

**Hyperparameter settings.** We include the hyperparameters used for training the GAN  $\gamma$ -model in Table 1 and the flow  $\gamma$ -model in Table 2.

We found the original GAN (Goodfellow et al., 2014) and the least-squares GAN (Mao et al., 2016) formulation to be equally effective for training  $\gamma$ -models as GANs.

## Appendix D Environment Details

**Acrobot-v1** is a two-link system (Sutton, 1996). The goal is to swing the lower link above a threshold height. The eight-dimensional observation is given by  $[\cos \theta_0, \sin \theta_0, \cos \theta_1, \sin \theta_1, \frac{d}{dt} \theta_0, \frac{d}{dt} \theta_1]$ . We modify it to have a one-dimensional continuous action space instead of the standard three-dimensional discrete action space. We provide reward shaping in the form of  $r_{\text{shaped}} = -\cos \theta_0 - \cos(\theta_0 + \theta_1)$ .

**MountainCarContinuous-v0** is a car on a track (Moore, 1990). The goal is to drive the car up a high too high to summit without built-up momentum. The two-dimensional observation space is  $[x, \frac{d}{dt} x]$ . We provide reward shaping in the form of  $r_{\text{shaped}} = x$ .

Table 2: Flow  $\gamma$ -model hyperparameters (Algorithm 2)

| Parameter                                                                | Value             |
|--------------------------------------------------------------------------|-------------------|
| Batch size                                                               | 1024              |
| Number of $\mathbf{s}_e$ samples per $(\mathbf{s}_t, \mathbf{a}_t)$ pair | 1                 |
| Delay parameter $\tau$                                                   | $5 \cdot 10^{-3}$ |
| Step size $\lambda$                                                      | $1 \cdot 10^{-4}$ |
| Replay buffer size (off-policy prediction experiments)                   | $2 \cdot 10^5$    |
| Single-step Gaussian variance $\sigma^2$                                 | $1 \cdot 10^{-2}$ |

**Pendulum-v0** is a single-link system. The link starts in a random position and the goal is to swing it upright. The three-dimensional observation space is given by  $[\cos \theta, \sin \theta, \frac{d}{dt} \theta]$ .

**Reacher-v2** is a two-link arm. The objective is to move the end effector  $\mathbf{e}$  of the arm to a randomly sampled goal position  $\mathbf{g}$ . The 11-dimensional observation space is given by  $[\cos \theta_0, \cos \theta_1, \sin \theta_0, \sin \theta_1, \mathbf{g}_x, \mathbf{g}_y, \frac{d}{dt} \theta_0, \frac{d}{dt} \theta_1, \mathbf{e}_x - \mathbf{g}_x, \mathbf{e}_y - \mathbf{g}_y, \mathbf{e}_z - \mathbf{g}_z]$ .

Model-based methods often make use of shaped reward functions during model-based rollouts (Chua et al., 2018). For fair comparison, when using shaped rewards we also make the same shaping available to model-free methods.

## Appendix E Adversarial $\gamma$ -Model Predictions

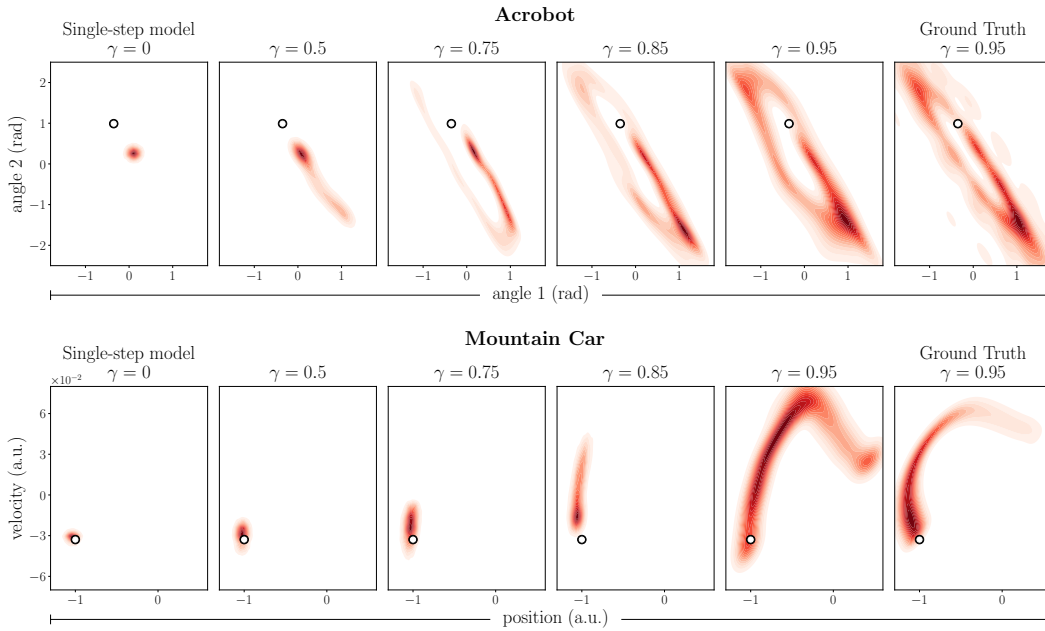

Figure 6: Visualization of the distribution from a single feedforward pass of  $\gamma$ -models trained as GANs according to Algorithm 1. GAN-based  $\gamma$ -models tend to be more unstable than normalizing flow  $\gamma$ -models, especially at higher discounts.
